# Supplementary material
Source: publisher figshare collection journal article supplement (https://acs.figshare.com/ndownloader/files/8248052)
Supplement: Supplementary file 1 [file 8248052]

## **Supporting Information**

### **Electrochemical activation of graphene at low temperature: the synthesis of three-dimensional nanoarchitectures for high performance supercapacitor and capacitive deionization**

***Mohamed Zoromba<sup>1,2</sup>, Mohamed Abdel-Aziz<sup>1,3</sup>, Mohamed Bassyouni<sup>1, 4</sup>, Saud Gutub<sup>5</sup>, Denisa Demko<sup>6</sup>, Amr Abdelkader<sup>6,7\*</sup>***

<sup>1</sup>Chemical and Materials Engineering Department, King Abdulaziz University, Rabigh 21911, Saudi Arabia

<sup>2</sup>Department of Chemistry, Faculty of Science, Port Said University, Port Said, Egypt.

<sup>3</sup>Chemical Engineering Department, Faculty of Engineering, Alexandria University, Alexandria, Egypt

<sup>4</sup>Department of Chemical Engineering, Higher Technological Institute, Tenth of Ramdan City, Egypt

<sup>5</sup>Civil Engineering Department, King Abdulaziz University, Rabigh 21911, Saudi Arabia

<sup>6</sup>Department of Engineering, University of Cambridge, Cambridge, CB3 0FA, UK

<sup>7</sup>National Graphene Institute (NGI), University of Manchester, Booth Street East, Manchester, M13 9QS, UK

\*Corresponding author. Tel.: +441223 748349, Fax: +44 - 1223 - 748348, □\*E-mail address: [aa494@cam.ac.uk](mailto:aa494@cam.ac.uk)

**10 Pages**

**5 Figures**

**2 Tables**

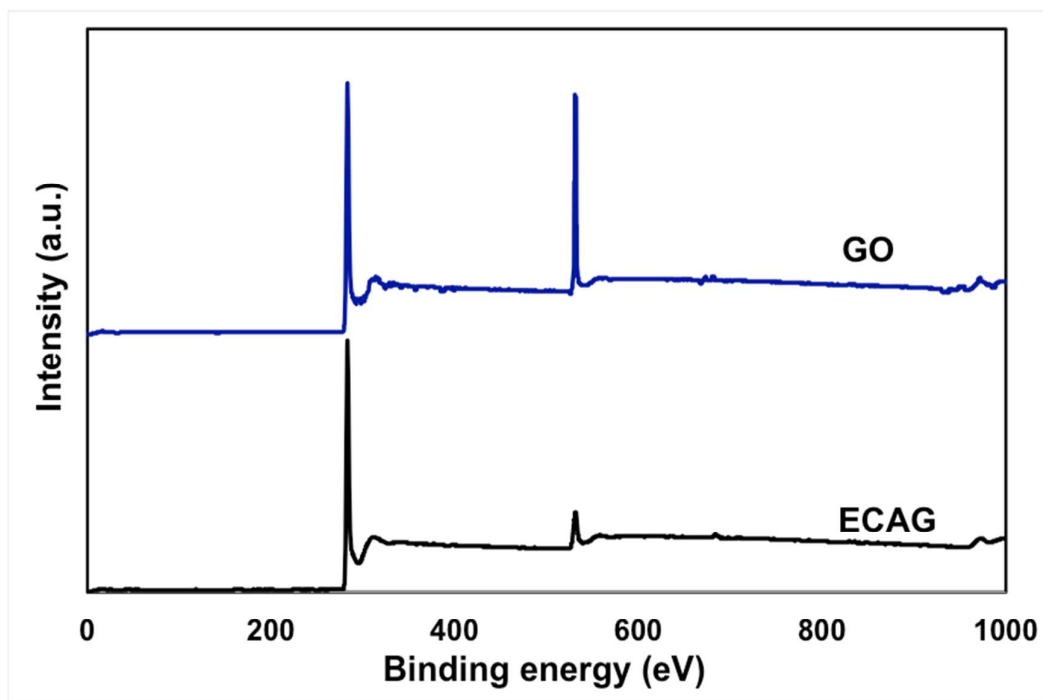

**Figure S1.** XPS survey spectra of the GO and the ECAG. The intensity of the O1s peak at ~531 eV significantly reduced due to the removal of the oxygen groups.

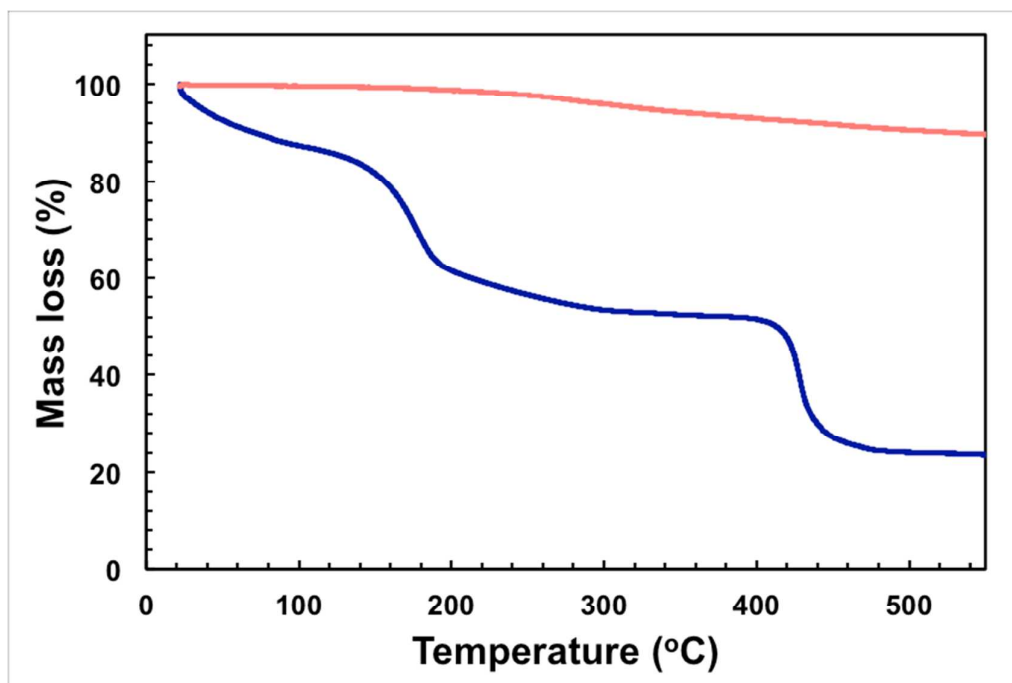

**Figure S2.** Thermal gravimetric curve for the GO (blue) and the ECAG (red) showing the stability of the sample after the electrochemical treatment due to the removal of the oxygen functional groups.

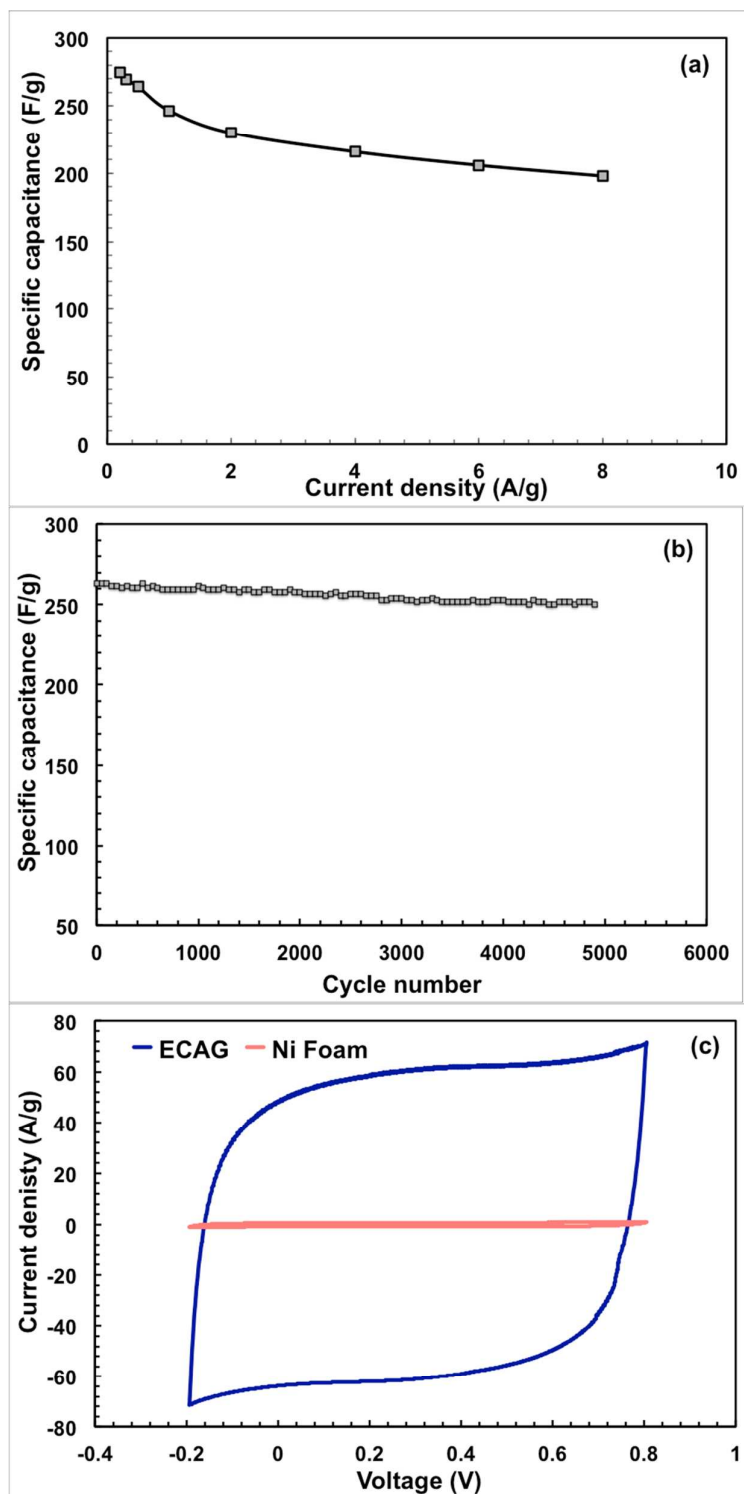

**Figure S3.** (a) The change of the specific capacitance as a function of the current density of the supercapacitor symmetrical device made from 2 ECAG electrodes in 6 M KOH solution. (b) Cycle life stability of the symmetrical device in 6 M KOH solution, (c) CV measured for a 2 symmetrical supercapacitor devices fabricated from Ni foam and ECAG electrodes. The pseudocapacitance from the Ni foam is negligible as compared to the ECAG electrode.

## Further analysis of the electrosorption ion removal process

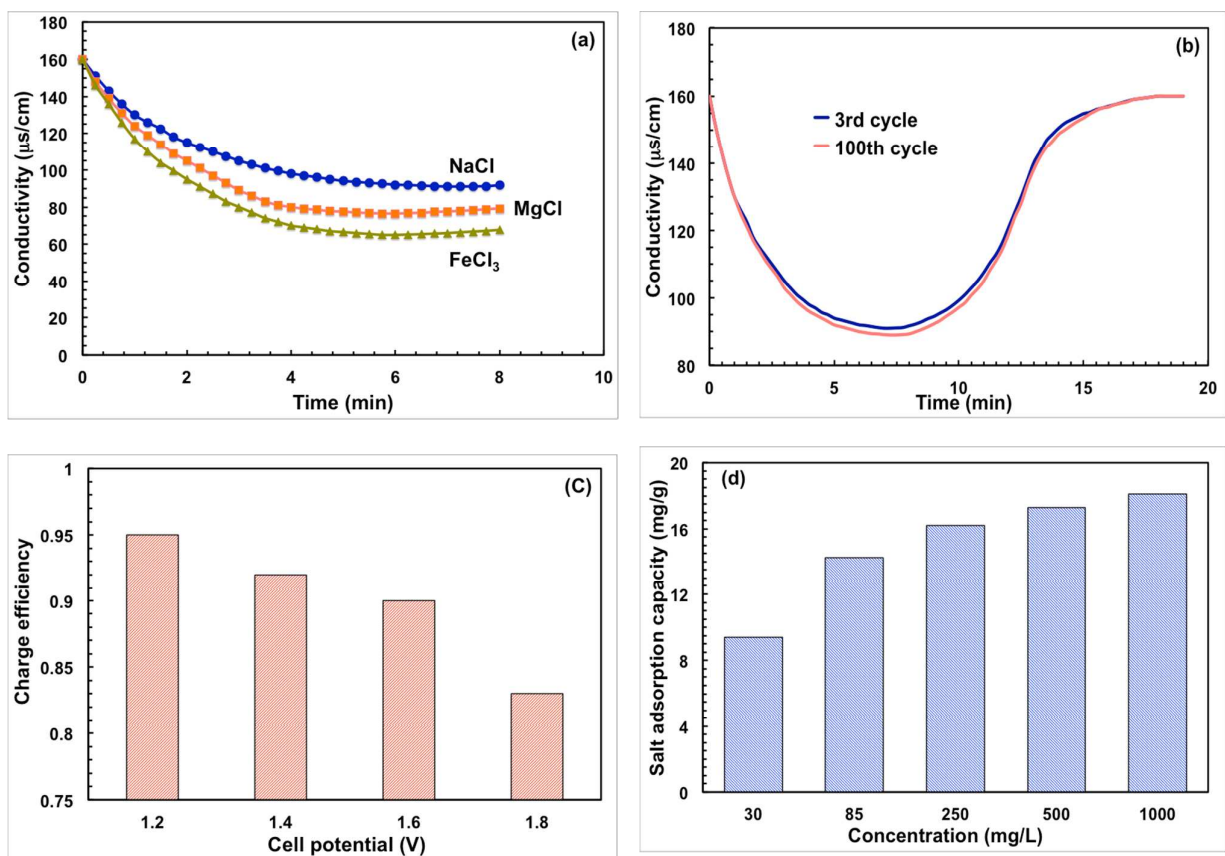

**Figure S4.** (a) Comparison of the change in the conductivity with time for different types of salts. (b) The electrosorption curve measured for the DCI device with ECAG electrode after 3 and 100 cycles, confirming the stability of the electrode (c) Equilibrium charge efficacy as a function of the applied potential (d) Equilibrium salt adsorption capacity as a function of the initial concentration of the NaCl solution.

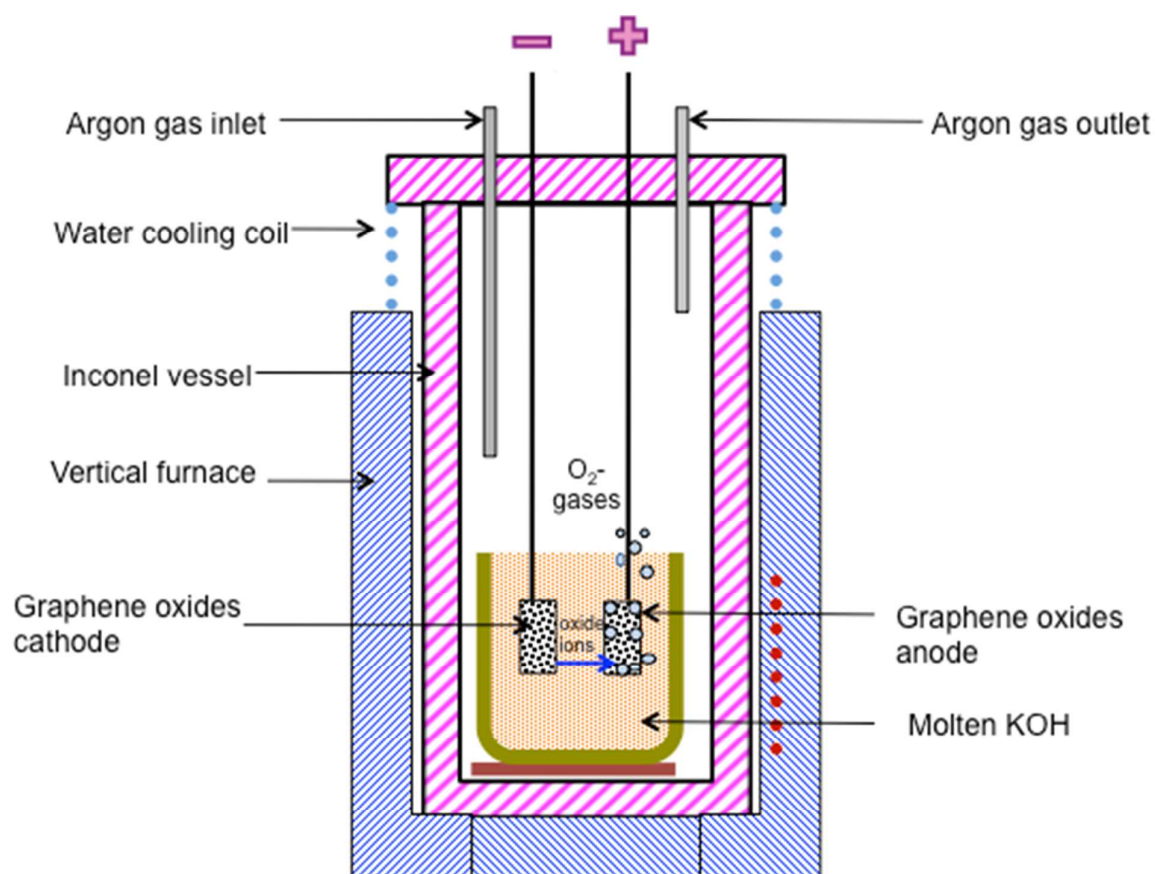

**Figure S5.** The molten salts reactor used for the electrochemical activation process.

## Calculating the specific capacitance obtained from CV and charge-discharge curves

From charge-discharge measurements, the specific capacitances of the rGO were obtained from the acquired data using following equation:

$$C = 4I\Delta t / m\Delta V \quad (1)$$

Where  $C$  represents the specific capacitances,  $I$  the constant charge current,  $\Delta t$  for the discharging period,  $m$  for the mass of graphene used as electrodes,  $\Delta V$  for the voltage of capacitor after constant current charging.

From CV curves, the specific capacitances were calculated according to the following equation:

$$C = (fIdV) / (vmV) \quad (2)$$

Where  $I$  represents the current density during charging-discharging,  $V$  is the potential,  $v$  is the potential scanning rate, and  $m$  is the mass of the graphene electrodes.

## Calculating the electrosorption capacity:

The electrosorption capacity ( $Q$ ) of the electrode was calculated from the following equation:

$$Q = \frac{(C_0 - C)V}{m} \quad (3)$$

Where  $C_0$  and  $C$  (mg/L) were the initial and equilibrium concentration of NaCl, respectively.  $V$  was the volume of the NaCl solution in the CDI device, and  $m$  was the total mass loading of the active material ECAG.

The charge efficiency  $\Lambda$  was calculated from the equation:

$$\Lambda = Q/\Sigma \quad (4)$$

Where  $Q$  is the electrosorption capacity calculated at equilibrium (at the point of minimum conductivity in the outlet stream and  $\Sigma$  is the equilibrium charge,  $\Sigma = \int I dt$ .

**Table S1.** Comparison of the electrochemical performance of rGO supercapacitor electrodes from different reduction method

| Process                                                                                    | C/O ratio       | Electrical conductivity (S/m)      | Specific Capacitance (F/g)                                                                 | Specific surface area (m <sup>2</sup> /g) | Specific capacitance Retention %     |
|--------------------------------------------------------------------------------------------|-----------------|------------------------------------|--------------------------------------------------------------------------------------------|-------------------------------------------|--------------------------------------|
| Reduction by microwave irradiation then activated by KOH. <sup>1</sup>                     | 35              | 500 (Pressed Powder)               | 200 ionic liquid                                                                           | 3100 (activated)                          | 97 after 10000 cycles                |
| Reduction by hydrazine at 100 °C. <sup>2</sup>                                             | 11.5            | 200 (Pressed Powder)               | 135 KOH                                                                                    | 705                                       | Unknown                              |
| Reduction with Hydrazine vapor at low pressure. <sup>3</sup>                               | 7.3             | 100 Film                           | 205 KOH                                                                                    | 320                                       | 90 after 1200 cycles                 |
| Thermal reduction at 200 °C under high vacuum (below 1 Pa). <sup>4</sup>                   | 10              | Unknown                            | 122 KOH                                                                                    | 350                                       | ~ 94 after 100 cycles                |
| Solvothermal reduction in propylene carbonate at 150 °C. <sup>5</sup>                      | 8.3             | 2100 (Paper-like)                  | 120 Organic                                                                                | Unknown                                   | Unknown                              |
| Reduction with hydrobromic acid at 110 °C. <sup>6</sup>                                    | 3.9             | 0.023                              | 348 in H <sub>2</sub> SO <sub>4</sub> and 158 in ionic liquid (pseudocapacitance involved) | Unknown                                   | Increased to 125 % after 1800 cycle  |
| Thermal reduction at 1050 °C. <sup>7</sup>                                                 | 10 <sup>8</sup> | 2300 (Pressed powder) <sup>8</sup> | 117 H <sub>2</sub> SO <sub>4</sub>                                                         | 925                                       | Unknown                              |
| Solvothermal reduction in DMF at 150 °C. <sup>9</sup>                                      | 5.97            | Unknown                            | 276 H <sub>2</sub> SO <sub>4</sub> (pseudocapacitance involved)                            | Unknown                                   | Increased to 106 % after 1980 cycles |
| Reduction with urea at 95 °C. <sup>10</sup>                                                | 4.5             | 43 (Paper-like)                    | 255 H <sub>2</sub> SO <sub>4</sub> (pseudocapacitance involved)                            | 590                                       | 93% after 1200 cycles                |
| Reduction with urea at 95 °C followed by annealing at 800 °C under nitrogen. <sup>10</sup> | 19.7            | 4520 (Annealed paper)              | 172 H <sub>2</sub> SO <sub>4</sub>                                                         | 630                                       | 94% after 1200 cycle                 |
| Hydrothermal reduction with sodium ascorbate at 95 °C. <sup>11</sup>                       | 10.3            | 1 (hydrogel)                       | 190 H <sub>2</sub> SO <sub>4</sub> <sup>12</sup><br>186 solid state                        | 414                                       | 93.6 after 10000 cycles              |
| Reduction by laser irradiation. <sup>13</sup>                                              |                 | 1738 (film)                        | 204 solid state                                                                            | 1520                                      | 95% after 1000 cycles                |
| Electrochemical reduction in molten salt. <sup>14</sup>                                    | 12.5            | 2300 (membrane)                    | 255 KOH                                                                                    | 565                                       | 95% after 5000 cycles                |
| Reduction by Li in molten LiCl-KCl at 370 °C. <sup>15</sup>                                | 7               | 2400 (paper-like)                  | 203 KOH                                                                                    | 320                                       | 97% after 2000 cycles                |

**Table S2.** Salt electrosorption performance reported for different carbon materials as electrodes for CDI.

| Carbon Materials                             | Initial Concentration (mg/ml) | Electrosorption capacity(mg/g) | Time until equilibrium (min) | Electrosorption rate(mg/g.min) | Charge efficiency | Flow rate (mL/min) | Cell potential (V) | Ref |
|----------------------------------------------|-------------------------------|--------------------------------|------------------------------|--------------------------------|-------------------|--------------------|--------------------|-----|
| Activated Carbon                             | 1000                          | 5.9                            | ~7                           |                                | 0.53              | 3                  | 1.6                | 16  |
| rGO/activated carbon                         | 50                            | 0.8                            | ~60                          | 0.12                           | 0.24              | 25                 | 2                  | 17  |
| Activated Carbon/QPVP                        | 500                           | 20.6                           | ~10                          | 1                              | 0.68              | 8.67               | 1.2                | 18  |
| Activated carbon cloth/ZnO                   | 1000                          | 7.7                            | ~6                           |                                | 0.78              | 3                  | 1.6                | 16  |
| Amine Modified Microporous Carbon            | 250                           | 5.3                            | ~60                          |                                | 0.53              | 20                 | 1.1                | 19  |
| Amine and carboxylic group modified graphene | 300                           | 18.43                          | ~10                          |                                | 0.87              | 20                 | 1.4                | 20  |
| Sulfonic and amine functionalised graphene   | 500                           | 13.72                          | ~80                          | 0.12                           | 0.85              | 40                 | 1.4                | 21  |
| Graphene-like nanoflakes                     | 25                            | 1.3                            | > 40                         |                                |                   | 45                 | 2                  | 22  |
| Graphene-CNT                                 | 29                            | 1.4                            | ~120                         |                                |                   | 25                 | 2                  | 23  |
| Graphene aerogel/TiO <sub>2</sub>            | 500                           | 15.1                           | ~6                           |                                | 0.68              | 30                 | 1.2                | 24  |
| Activated 3D graphene                        | 70                            | 11.86                          | ~25                          |                                |                   | 10                 | 2                  | 25  |
| Sulfonated graphene-carbon nanofibers        | 100                           | 9.54                           | ~65                          |                                | 0.43              | 5                  | 1.6                | 26  |
| Sponge templated graphene                    | 52                            | 4.95                           | ~60                          |                                |                   | 3                  | 1.5                | 27  |
| Porous Carbon Rods                           | 1000                          | 16.2                           | ~40                          |                                |                   | 27                 | 1.2                | 28  |
| Graphene-coated carbon spheres               | 29                            | 2.3                            | ~120                         |                                |                   | 25                 | 1.6                | 29  |
| Cellulose Derived Graphenic Fibers           | 500                           | 13.1                           | ~90-120                      |                                |                   |                    | 1.2                | 30  |
| 3-D macroporous graphene                     | 52                            | 5.93                           | ~50                          |                                |                   | 25                 | 2                  | 31  |

The equilibrium is defined as the point where the conductivity of the outlet stream stopped decreasing and started to increase.

## References:

- (1) Zhu, Y.; Murali, S.; Stoller, M. D.; Ganesh, K. J.; Cai, W.; Ferreira, P. J.; Pirkle, A.; Wallace, R. M.; Cychosz, K. A.; Thommes, M.; Su, D.; Stach, E. A.; Ruoff, R. S. Carbon-Based Supercapacitors Produced by Activation of Graphene, *Science* **2011**, *332*, 1537-1541.
- (2) Stoller, M. D.; Park, S.; Yanwu, Z.; An, J.; Ruoff, R. S. Graphene-Based ultracapacitors, *Nano Letters* **2008**, *8*, 3498-3502.
- (3) Wang, Y.; Shi, Z. Q.; Huang, Y.; Ma, Y. F.; Wang, C. Y.; Chen, M. M.; Chen, Y. S. Supercapacitor Devices Based on Graphene Materials, *J. Phys. Chem. C* **2009**, *113*, 13103-13107.
- (4) Lv, W.; Tang, D. M.; He, Y. B.; You, C. H.; Shi, Z. Q.; Chen, X. C.; Chen, C. M.; Hou, P. X.; Liu, C.; Yang, Q. H. Low-Temperature Exfoliated Graphenes: Vacuum-Promoted Exfoliation and Electrochemical Energy Storage, *Acs Nano* **2009**, *3*, 3730-3736.
- (5) Zhu, Y. W.; Stoller, M. D.; Cai, W. W.; Velamakanni, A.; Piner, R. D.; Chen, D.; Ruoff, R. S. Exfoliation of Graphite Oxide in Propylene Carbonate and Thermal Reduction of the Resulting Graphene Oxide Platelets, *Acs Nano* **2010**, *4*, 1227-1233.
- (6) Chen, Y.; Zhang, X.; Zhang, D.; Yu, P.; Ma, Y. High Performance Supercapacitors Based on Reduced Graphene Oxide in Aqueous and Ionic Liquid Electrolytes, *Carbon* **2011**, *49*, 573-580.
- (7) Vivekchand, S. R. C.; Rout, C. S.; Subrahmanyam, K. S.; Govindaraj, A.; Rao, C. N. R. Graphene-Based Electrochemical Supercapacitors, *J. Chem. Sci.* **2008**, *120*, 9-13.
- (8) Schniepp, H. C.; Li, J.-L.; McAllister, M. J.; Sai, H.; Herrera-Alonso, M.; Adamson, D. H.; Prud'homme, R. K.; Car, R.; Saville, D. A.; Aksay, I. A. Functionalized Single Graphene Sheets Derived from Splitting Graphite Oxide, *The Journal of Physical Chemistry B* **2006**, *110*, 8535-8539.
- (9) Lin, Z.; Liu, Y.; Yao, Y.; Hildreth, O. J.; Li, Z.; Moon, K.; Wong, C.-p. Superior Capacitance of Functionalized Graphene, *The Journal of Physical Chemistry C* **2011**, *115*, 7120-7125.
- (10) Lei, Z.; Lu, L.; Zhao, X. S. The Electrocapacitive Properties of Graphene Oxide Reduced by Urea, *Energy & Environmental Science* **2012**, *5*, 6391-6399.
- (11) Sheng, K.-x.; Xu, Y.-x.; Li, C.; Shi, G.-q. High-Performance Self-Assembled Graphene Hydrogels Prepared by Chemical Reduction of Graphene Oxide, *New Carbon Materials* **2011**, *26*, 9-15.
- (12) Xu, Y.; Lin, Z.; Huang, X.; Liu, Y.; Huang, Y.; Duan, X. Flexible Solid-State Supercapacitors Based on Three-Dimensional Graphene Hydrogel Films, *ACS Nano* **2013**, *7*, 4042-4049.
- (13) El-Kady, M. F.; Strong, V.; Dubin, S.; Kaner, R. B. Laser Scribing of High-Performance and Flexible Graphene-Based Electrochemical Capacitors, *Science* **2012**, *335*, 1326-1330.
- (14) Abdelkader, A. M. Electrochemical synthesis of highly corrugated graphene sheets for high performance supercapacitors, *Journal of Materials Chemistry A* **2015**, *3*, 8519-8525.
- (15) Abdelkader, A. M.; Vallés, C.; Cooper, A. J.; Kinloch, I. A.; Dryfe, R. A. W. Alkali reduction of graphene oxide in molten halide salts: Production of corrugated graphene derivatives for high-performance supercapacitors, *ACS Nano* **2014**, *8*, 11225-11233.
- (16) Laxman, K.; Myint, M. T. Z.; Khan, R.; Pervez, T.; Dutta, J. Improved desalination by zinc oxide nanorod induced electric field enhancement in capacitive deionization of brackish water, *Desalination* **2015**, *359*, 64-70.
- (17) Li, H.; Pan, L.; Nie, C.; Liu, Y.; Sun, Z. Reduced graphene oxide and activated carbon composites for capacitive deionization, *Journal of Materials Chemistry* **2012**, *22*, 15556-15561.

- (18) Wu, T.; Wang, G.; Zhan, F.; Dong, Q.; Ren, Q.; Wang, J.; Qiu, J. Surface-treated carbon electrodes with modified potential of zero charge for capacitive deionization, *Water Research* **2016**, *93*, 30-37.
- (19) Gao, X.; Omosebi, A.; Landon, J.; Liu, K. Enhanced Salt Removal in an Inverted Capacitive Deionization Cell Using Amine Modified Microporous Carbon Cathodes, *Environmental Science & Technology* **2015**, *49*, 10920-10926.
- (20) El-Deen, A. G.; Boom, R. M.; Kim, H. Y.; Duan, H.; Chan-Park, M. B.; Choi, J.-H. Flexible 3D Nanoporous Graphene for Desalination and Bio-decontamination of Brackish Water via Asymmetric Capacitive Deionization, *ACS Applied Materials & Interfaces* **2016**, *8*, 25313-25325.
- (21) Liu, P.; Wang, H.; Yan, T.; Zhang, J.; Shi, L.; Zhang, D. Grafting sulfonic and amine functional groups on 3D graphene for improved capacitive deionization, *Journal of Materials Chemistry A* **2016**, *4*, 5303-5313.
- (22) Li, H.; Zou, L.; Pan, L.; Sun, Z. Novel Graphene-Like Electrodes for Capacitive Deionization, *Environmental Science & Technology* **2010**, *44*, 8692-8697.
- (23) Zhang, D.; Yan, T.; Shi, L.; Peng, Z.; Wen, X.; Zhang, J. Enhanced capacitive deionization performance of graphene/carbon nanotube composites, *Journal of Materials Chemistry* **2012**, *22*, 14696-14704.
- (24) Yin, H.; Zhao, S.; Wan, J.; Tang, H.; Chang, L.; He, L.; Zhao, H.; Gao, Y.; Tang, Z. Three-Dimensional Graphene/Metal Oxide Nanoparticle Hybrids for High-Performance Capacitive Deionization of Saline Water, *Advanced Materials* **2013**, *25*, 6270-6276.
- (25) Li, Z.; Song, B.; Wu, Z.; Lin, Z.; Yao, Y.; Moon, K.-S.; Wong, C. P. 3D porous graphene with ultrahigh surface area for microscale capacitive deionization, *Nano Energy* **2015**, *11*, 711-718.
- (26) Qian, B.; Wang, G.; Ling, Z.; Dong, Q.; Wu, T.; Zhang, X.; Qiu, J. Sulfonated Graphene as Cation-Selective Coating: A New Strategy for High-Performance Membrane Capacitive Deionization, *Advanced Materials Interfaces* **2015**, *2*, 1500372-n/a.
- (27) Yang, Z. Y.; Jin, L. J.; Lu, G. Q.; Xiao, Q. Q.; Zhang, Y. X.; Jing, L.; Zhang, X. X.; Yan, Y. M.; Sun, K. N. Sponge-templated preparation of high surface area graphene with ultrahigh capacitive deionization performance, *Advanced Functional Materials* **2014**, *24*, 3917-3925.
- (28) Xu, X.; Li, J.; Wang, M.; Liu, Y.; Lu, T.; Pan, L. Shuttle-like Porous Carbon Rods from Carbonized Metal–Organic Frameworks for High-Performance Capacitive Deionization, *ChemElectroChem* **2016**, *3*, 993-998.
- (29) Wang, H.; Shi, L.; Yan, T.; Zhang, J.; Zhong, Q.; Zhang, D. Design of graphene-coated hollow mesoporous carbon spheres as high performance electrodes for capacitive deionization, *Journal of Materials Chemistry A* **2014**, *2*, 4739-4750.
- (30) Pugazhenthiran, N.; Sen Gupta, S.; Prabhath, A.; Manikandan, M.; Swathy, J. R.; Raman, V. K.; Pradeep, T. Cellulose Derived Graphenic Fibers for Capacitive Desalination of Brackish Water, *ACS Applied Materials & Interfaces* **2015**, *7*, 20156-20163.
- (31) Wang, H.; Zhang, D.; Yan, T.; Wen, X.; Zhang, J.; Shi, L.; Zhong, Q. Three-dimensional macroporous graphene architectures as high performance electrodes for capacitive deionization, *Journal of Materials Chemistry A* **2013**, *1*, 11778-11789.
